# Supplementary material for: Long-term life history predicts current elderly gut microbiome
Source: Research Square preprint supplement (doi:10.21203/rs.3.rs-130812/v1), 2021-01-25
Supplement: Supplementary file 1 [file 587f361b69e0675f25fa2dfd.xlsx]

## Sheet: Table 1
Supplementary Table 1. Pairwise adonis for age categories
Category	SumsOfSqs	F.Model	R2	p-value	FDR
Elderly vs Adults	1.04013	7.77676	0.00325691	0.001	0.001
Elderly vs Young adults	1.27034	9.40297	0.0106682	0.001	0.001
Adults vs Young adults	0.725957	5.60336	0.00313808	0.001	0.001

## Sheet: Table 2
Supplementary Table 2. Correlation between age and phyla in the elderly (adjusted for gender, BMI, stool moisture, and antibiotics)
Phyla	rho	p-value	FDR	Rank	Associated with age
p_Firmicutes	-0.342397	2.13234e-21	2.38036e-20	1	Yes
p_Bacteroidetes	-0.280944	1.23184e-14	5.33796e-14	2	Yes
p_Proteobacteria	-0.120475	0.00114439	0.00247951	3	Yes
p_Actinobacteria	-0.25745	1.86859e-12	6.07292e-12	4	Yes
p_Verrucomicrobia	-0.00250872	0.9462	0.9462	5
uc_k_Bacteria	-0.142394	0.00011824	0.000307424	6	Yes
p_Euryarchaeota	-0.0358159	0.335204	0.396151	7
p_Tenericutes	0.0709242	0.0561175	0.091191	8	Yes
p_Fusobacteria	-0.064318	0.0833065	0.120332	9
p_Lentisphaerae	0.0623318	0.093302	0.121293	10
p_Synergistetes	-0.028661	0.44066	0.477381	11
p_Spirochaetes	0.340483	3.66209e-21	2.38036e-20	12	Yes
p_Elusimicrobia	0.105626	0.0043845	0.00814263	13	Yes

## Sheet: Table 3
Supplementary Table 3. Correlation between age and genera in the elderly (adjusted for gender, BMI, stool moisture, and antibiotics)
Genera	rho	p-value	FDR	Rank	Associated with age
g_Bacteroides	-0.177437	1.50241e-06	2.81166e-06	1	Yes
g_Faecalibacterium	-0.276395	3.38522e-14	1.05587e-13	2	Yes
g_Roseburia	-0.278105	2.3203e-14	7.59898e-14	3	Yes
g_Blautia	-0.299298	1.72003e-16	6.43784e-16	4	Yes
g_Prevotella	-0.108901	0.00330372	0.00455566	5	Yes
g_Ruminococcus	-0.114576	0.00198781	0.00280003	6	Yes
g_Alistipes	-0.0710988	0.0555133	0.0686061	7	Yes
g_Escherichia_Shigella	-0.0299358	0.420593	0.459147	8
g_Clostridium_XlVa	-0.222489	1.35586e-09	3.28921e-09	9	Yes
g_Coprococcus	-0.232125	2.44592e-10	6.40832e-10	10	Yes
g_Clostridium_IV	-0.152921	3.50929e-05	5.60631e-05	11	Yes
g_Bifidobacterium	-0.153674	3.20701e-05	5.18664e-05	12	Yes
g_Dorea	-0.314268	4.17638e-18	1.76486e-17	13	Yes
g_Anaerostipes	-0.265129	3.82002e-13	1.13732e-12	14	Yes
g_Ruminococcus2	-0.304588	4.73835e-17	1.88098e-16	15	Yes
g_Parabacteroides	-0.141229	0.000134575	0.000207404	16	Yes
g_Fusicatenibacter	-0.288594	2.15701e-15	7.63697e-15	17	Yes
g_Gemmiger	-0.13693	0.000215115	0.000320228	18	Yes
g_Oscillibacter	-0.0569794	0.12506	0.147594	19
g_Butyrivibrio	-0.302177	8.55444e-17	3.29597e-16	20	Yes
g_Clostridium_XVIII	-0.188075	3.31761e-07	6.48666e-07	21	Yes
g_Streptococcus	-0.0510492	0.169437	0.194803	22
g_Holdemanella	0.0747822	0.0439771	0.0548667	23	Yes
g_Barnesiella	-0.0915834	0.0135644	0.0177694	24	Yes
g_Akkermansia	-0.00260811	0.944072	0.951334	25
g_Dialister	0.0143446	0.699601	0.727362	26
g_Sporobacter	0.0247987	0.504685	0.53751	27
g_Butyricicoccus	-0.339503	4.82467e-21	2.52813e-20	28	Yes
g_Sutterella	-0.00189676	0.95931	0.95931	29
g_Lactobacillus	0.164029	8.90602e-06	1.54448e-05	30	Yes
g_Collinsella	-0.179356	1.15144e-06	2.21822e-06	31	Yes
g_Intestinibacter	-0.0139565	0.707349	0.729628	32
g_Phascolarctobacterium	-0.077709	0.0363153	0.0457434	33	Yes
g_Succinivibrio	0.321023	7.2684e-19	3.28331e-18	34	Yes
g_Paraprevotella	-0.115641	0.00180251	0.00256661	35	Yes
g_Clostridium_sensu_stricto	-0.0695773	0.0609638	0.074638	36	Yes
g_Alloprevotella	0.200906	4.76875e-08	9.91598e-08	37	Yes
g_Parasutterella	-0.19321	1.55052e-07	3.07755e-07	38	Yes
g_Megamonas	0.309493	1.39957e-17	5.7295e-17	39	Yes
g_Catenibacterium	-0.0266623	0.473195	0.508103	40
g_Enterobacter	-0.207226	1.7483e-08	3.81712e-08	41	Yes
g_Intestinimonas	-0.222129	1.44338e-09	3.39322e-09	42	Yes
g_Desulfovibrio	0.0123147	0.740454	0.757809	43
g_Clostridium_XlVb	-0.220247	1.9975e-09	4.59074e-09	44	Yes
g_Megasphaera	-0.22376	1.08648e-09	2.68546e-09	45	Yes
g_Butyricimonas	-0.0778403	0.0360001	0.0457434	46	Yes
g_Methanobrevibacter	0.0685075	0.0650551	0.0789095	47	Yes
g_Odoribacter	-0.138402	0.000183482	0.000276277	48	Yes
g_Aestuariispira	-0.113067	0.00228036	0.00317794	49	Yes
g_Romboutsia	-0.164365	8.53113e-06	1.51024e-05	50	Yes
g_Asteroleplasma	0.250198	7.98149e-12	2.22463e-11	51	Yes
g_Bilophila	-0.158917	1.69338e-05	2.80801e-05	52	Yes
g_Hespellia	-0.355644	4.54075e-23	3.71774e-22	53	Yes
g_Acidaminococcus	-0.35458	6.22914e-23	4.53343e-22	54	Yes
g_Flavonifractor	-0.13476	0.000271174	0.000399144	55	Yes
g_Anaerophaga	0.319496	1.08328e-18	4.73034e-18	56	Yes
g_Adlercreutzia	-0.0591441	0.111329	0.133799	57
g_Fusobacterium	-0.348447	3.76033e-22	2.34573e-21	58	Yes
g_Hydrogenoanaerobacterium	-0.0208232	0.575369	0.602987	59
g_Terrisporobacter	-0.104617	0.00477668	0.00645098	60	Yes
g_Anaerosporobacter	0.0542021	0.144566	0.16909	61
g_Senegalimassilia	-0.142507	0.000116756	0.000182083	62	Yes
g_Enterococcus	0.0267355	0.471981	0.508103	63
g_Mogibacterium	-0.19796	7.5309e-08	1.51777e-07	64	Yes
g_Citrobacter	-0.399598	3.28475e-29	8.60605e-28	65	Yes
g_Victivallis	0.116232	0.00170666	0.00245684	66	Yes
g_Succiniclasticum	-0.163762	9.21475e-06	1.5677e-05	67	Yes
g_Eisenbergiella	-0.222101	1.45054e-09	3.39322e-09	68	Yes
g_Mitsuokella	0.225045	8.67364e-10	2.18509e-09	69	Yes
g_Lactococcus	0.0877427	0.0180465	0.0234069	70	Yes
g_Pseudoflavonifractor	0.10637	0.00411413	0.00561408	71	Yes
g_Veillonella	0.0814457	0.0282089	0.0362291	72	Yes
g_Subdoligranulum	0.0956606	0.00990893	0.0131118	73	Yes
g_Coprobacter	-0.199147	6.26954e-08	1.2833e-07	74	Yes
g_Peptococcus	-0.244125	2.60013e-11	7.09619e-11	75	Yes
g_Turicibacter	0.0580857	0.117886	0.140392	76
g_Coprobacillus	-0.277833	2.46445e-14	7.87422e-14	77	Yes
g_Faecalicoccus	-0.0222526	0.549424	0.580439	78
g_Cerasicoccus	0.122397	0.00095089	0.00138407	79	Yes
g_Olsenella	-0.169786	4.21784e-06	7.67412e-06	80	Yes
g_Acetanaerobacterium	-0.154961	2.74682e-05	4.49791e-05	81	Yes
g_Haemophilus	-0.165272	7.59523e-06	1.36298e-05	82	Yes
g_Enterorhabdus	-0.211274	9.03918e-09	2.04161e-08	83	Yes
g_Anaerotruncus	-0.0337649	0.363632	0.400301	84
g_Slackia	0.0396031	0.286577	0.320868	85
g_Hungatella	0.280675	1.30863e-14	4.51133e-14	86	Yes
g_Cloacibacillus	0.0351523	0.344242	0.382167	87
g_Pseudomonas	0.0485796	0.191055	0.217637	88
g_Bulleidia	-0.326467	1.71868e-19	8.33879e-19	89	Yes
g_Faecalitalea	0.200966	4.72426e-08	9.91598e-08	90	Yes
g_Howardella	0.139575	0.000161444	0.000245921	91	Yes
g_Treponema	0.356688	3.3266e-23	2.90523e-22	92	Yes
g_Clostridium_III	0.178502	1.29663e-06	2.46171e-06	93	Yes
g_Eggerthella	0.0510389	0.169524	0.194803	94
g_Methanomassiliicoccus	0.235757	1.25708e-10	3.36075e-10	95	Yes
g_Oligosphaera	-0.203604	3.11909e-08	6.69838e-08	96	Yes
g_Eubacterium	0.25671	2.17168e-12	6.18455e-12	97	Yes
g_Allisonella	-0.349306	2.93001e-22	1.91916e-21	98	Yes
g_Defluviitalea	-0.163981	8.96034e-06	1.54448e-05	99	Yes
g_Falsiporphyromonas	0.34734	5.1803e-22	2.95052e-21	100	Yes
g_Actinomyces	-0.210067	1.10179e-08	2.44634e-08	101	Yes
g_Acetitomaculum	-0.0471033	0.20491	0.231407	102
g_Pyramidobacter	0.330507	5.78518e-20	2.91484e-19	103	Yes
g_Pseudobutyrivibrio	-0.275866	3.80272e-14	1.1585e-13	104	Yes
g_Methanosphaera	-0.226906	6.24428e-10	1.60392e-09	105	Yes
g_Desulfomicrobium	0.294638	5.24144e-16	1.9073e-15	106	Yes
g_Holdemania	-0.159405	1.5939e-05	2.67693e-05	107	Yes
g_Eggerthia	0.0983825	0.00798444	0.0106731	108	Yes
g_Oxalobacter	0.17236	2.99544e-06	5.52679e-06	109	Yes
g_Heliobacillus	0.144206	9.64879e-05	0.000152288	110	Yes
g_Yersinia	-0.352665	1.09669e-22	7.56136e-22	111	Yes
g_Elusimicrobium	0.323577	3.7091e-19	1.73533e-18	112	Yes
g_Clostridium_XI	0.364943	2.72595e-24	3.24636e-23	113	Yes
g_Morganella	0.362993	4.95513e-24	5.40935e-23	114	Yes
g_Gordonibacter	-0.0110463	0.766366	0.778248	115
g_Oribacterium	0.37342	1.93381e-25	4.22216e-24	116	Yes
g_Leuconostoc	0.278627	2.06643e-14	6.94108e-14	117	Yes
g_Lactonifactor	0.347411	5.0744e-22	2.95052e-21	118	Yes
g_Macellibacteroides	-0.418945	3.20008e-32	1.39737e-30	119	Yes
g_Acetoanaerobium	0.36108	8.87012e-24	8.93835e-23	120	Yes
g_Parvimonas	0.340235	3.9275e-21	2.14376e-20	121	Yes
g_Cellulosilyticum	0.370593	4.71452e-25	8.82288e-24	122	Yes
g_Vampirovibrio	0.261648	7.89569e-13	2.29852e-12	123	Yes
g_Weissella	-0.422592	8.22395e-33	5.38669e-31	124	Yes
g_Rikenella	0.368135	1.01605e-24	1.66378e-23	125	Yes
g_Selenomonas	0.357668	2.48168e-23	2.32215e-22	126	Yes
g_Helicobacter	0.367054	1.421e-24	1.86151e-23	127	Yes
g_Corynebacterium	-0.414316	1.75246e-31	5.73929e-30	128	Yes
g_Comamonas	0.367519	1.22997e-24	1.79029e-23	129	Yes
g_Peptoniphilus	0.355271	5.07394e-23	3.90992e-22	130	Yes
g_Robinsoniella	-0.426413	1.94583e-33	2.54904e-31	131	Yes

## Sheet: Table 4
Supplementary Table 4. Collinearity test
	Test for collinearity (Spearman for continuous variables)
Year	Var1	Var2	rho	p-value	Variable kept
1990	Smoking	Pack-years	0.928456	< 0.001	Smoking
	LDL cholesterol (Friedewald)	LDL cholesterol (direct)	0.922356	< 0.002	none
	Total cholesterol	LDL cholesterol (Friedewald)	0.904063	< 0.003	Total cholesterol
	Total cholesterol	LDL cholesterol (direct)	0.898025	< 0.004	Total cholesterol
	Systolic blood pressure	Diastolic blood pressure	0.877125	< 0.005	Systolic blood pressure
	Smoking	Cigarette numbers per day	0.812968	< 0.006	Smoking
2010	Haemoglobin	Haematocrit	0.949169	< 0.007	Haemoglobin
	Smoking	Pack-years	0.926372	< 0.008	Smoking
	Total cholesterol	LDL cholesterol	0.918455	< 0.009	Total cholesterol
	Urin: albumin per creatinine	Urin: albumin	0.862383	< 0.010	Urin: albumin
	Weight	Waist circumference	0.855437	< 0.011	none
	Hip circumferenec	BMI	0.832928	< 0.012	BMI
	Physical activity	Sport physical activity	0.82529	< 0.013	Physical activity
	Caloric intake	Total carbohydrate intake	0.823062	< 0.014	Caloric intake
	Waist circumference	BMI	0.80692	< 0.015	BMI
2016	Visceral fat thickness measurement 2	Visceral fat thickness measurement 1	0.976407	< 0.016	Visceral fat thickness measurement 2
	Visceral fat thickness measurement 3	Visceral fat thickness measurement 1	0.977112	< 0.017	none
	Visceral fat thickness measurement 3	Visceral fat thickness measurement 2	0.983364	< 0.018	Visceral fat thickness measurement 2
	Subcutaneous fat thickness 3	Subcutaneous fat thickness 2	0.940436	< 0.019	Subcutaneous fat thickness 2
	Subcutaneous fat thickness 1	Subcutaneous fat thickness 2	0.914439	< 0.020	Subcutaneous fat thickness 2
	Subcutaneous fat thickness 1	Subcutaneous fat thickness 3	0.918058	< 0.021	none
	Alcohol intake	Alcohol score	0.891442	< 0.001	Alcohol score
	Red wine intake	Alcohol score	0.91276	< 0.001	Alcohol score
	Brown bread intake	Cereal fiber score	0.813852	< 0.001	Cereal fiber score
	Nuts intake	Nuts and soy score	0.98187	< 0.001	Nuts and soy score
	Red wine intake	Alcohol intake	0.828527	< 0.001	none
	Activated partial thromboplastin time ratio	Activated partial thromboplastin time	0.999339	< 0.001	Activated partial thromboplastin time
	Hip circumference	Body-mass index	0.84633	< 0.001	Body-mass index
	Weight	Body-mass index	0.825206	< 0.001	Body-mass index
	Caloric intake	Total carbohydrate intake	0.824732	< 0.001	Caloric intake
	Social status	Education years	0.825083	< 0.001	Education years
	Electrophoresis: alpha-1 (%)	Electrophoresis: alpha-1 (g/dL)	0.879591	< 0.001	Electrophoresis: alpha-1 (g/dL)
	Electrophoresis: alpha-2 (%)	Electrophoresis: alpha-2 (g/dL)	0.916662	< 0.001	Electrophoresis: alpha-2 (g/dL)
	Electrophoresis: albumin (%)	Electrophoresis: a/g (Unitless)	0.999866	< 0.001	Electrophoresis: a/g (Unitless)
	Electrophoresis: beta-1 (%)	Electrophoresis: beta-1 (g/dL)	0.830736	< 0.001	Electrophoresis: beta-1 (g/dL)
	Electrophoresis: beta-2 (%)	Electrophoresis: beta-2 (g/dL)	0.9455	< 0.001	Electrophoresis: beta-2 (g/dL)
	Electrophoresis: gamma (%)	Electrophoresis: gamma (g/dL)	0.967274	< 0.001	Electrophoresis: gamma (g/dL)
	Eosinophil count (%)	Eosinophil count	0.850994	< 0.001	Eosinophil count
	Haemoglobin	Haematocrit	0.948792	< 0.001	Haemoglobin
	Red blood cell count	Haematocrit	0.857719	< 0.001	Haemoglobin
	Red blood cell count	Haemoglobin	0.827601	< 0.001	Haemoglobin
	Prothrombin activity	International normalized ratio	-0.998263	< 0.001	International normalized ratio
	Transferrin saturation	Iron level	0.87794	< 0.001	Iron level
	Total cholesterol	LDL cholesterol	0.921229	< 0.001	Total cholesterol
	Neutrophil count %	Lymphocyte %	-0.929145	< 0.001	Neutrophil count %
	Mean corpuscular volume	Mean corpuscular haemoglobin	0.838257	< 0.001	Mean corpuscular volume
	Physical activity	Sports physical activity	0.825989	< 0.001	Physical activity
	White blood cell count	Neutrophil count	0.884668	< 0.001	White blood cell count
	Smoking	Pack-years of smoking	0.944387	< 0.001	Smoking
	Urin: albumin per creatinine	Urin: albumin	0.931736	< 0.001	Urin: albumin
	Urin: specific gravity	Urin: creatinine	0.833249	< 0.001	Urin: creatinine
	Weight	Waist circumference	0.840615	< 0.001	none
1990-2016	Weight	BMI	0.952801	< 0.001	BMI
	Thrombocyte aggregation inhibitors	Aspirin	0.94744	< 0.001	Aspirin
	Smoking	Pack-years	0.932969	< 0.001	Smoking
	Total cholesterol	LDL cholesterol	0.922099	< 0.001	Total cholesterol
	Oral andibiabetics	Diabetic medication type1 dose	0.8885	< 0.001	none
	Metformin	Oral andibiabetics	0.872666	< 0.001	none
	Oral andibiabetics	Diabetes (ADA criteria)	0.824059	< 0.001	Diabetes (ADA criteria)
1995-2016	Thrombocyte aggregation inhibitors	Aspirin	0.947014	< 0.001	Aspirin
	Weight	BMI	0.943209	< 0.001	BMI
	Total cholesterol	LDL cholesterol	0.936172	< 0.001	Total cholesterol
	Haemoglobin	Haematocrit	0.93586	< 0.001	Haemoglobin
	Smoking	Pack-years	0.934015	< 0.001	Smoking
	Metformin	Oral andibiabetics	0.905981	< 0.001	none
	Caloric intake	Total carbohydrate intake	0.841278	< 0.001	Caloric intake
	Oral andibiabetics	Diabetes (ADA criteria)	0.826707	< 0.001	Diabetes (ADA criteria)
2000-2016	Thrombocyte aggregation inhibitors	Aspirin	0.942439	< 0.001	Aspirin
	Weight	BMI	0.940962	< 0.001	BMI
	Smoking	Pack-years	0.940623	< 0.001	Smoking
	Total cholesterol	LDL cholesterol	0.93326	< 0.001	Total cholesterol
	Haemoglobin	Haematocrit	0.928725	< 0.001	Haemoglobin
	Metformin	Oral andibiabetics	0.909223	< 0.001	Metformin
	Urin: albumin per creatinine	Urin: albumin	0.870257	< 0.001	Urin: albumin
	Sport physical activity	Physical activity	0.810402	< 0.001	Physical activity
2005-2016	Thrombocyte aggregation inhibitors	Aspirin	0.956411	< 0.001	Aspirin
	Smoking	Pack-years	0.947467	< 0.001	Smoking
	Weight	BMI	0.927709	< 0.001	BMI
	Total cholesterol	LDL cholesterol	0.921281	< 0.001	Total cholesterol
	Haemoglobin	Haematocrit	0.909277	< 0.001	Haemoglobin
	Metformin	Oral andibiabetics	0.906725	< 0.001	none
	Urin: albumin per creatinine	Urin: albumin	0.878294	< 0.001	Urin: albumin
	Sport physical activity	Physical activity	0.852294	< 0.001	Physical activity
	Oral andibiabetics	Diabetes (ADA criteria)	0.829209	< 0.001	Diabetes (ADA criteria)
	Caloric intake	Total carbohydrate intake	0.806615	< 0.001	Caloric intake
Average	Haemoglobin	Haematocrit	0.966725	< 0.001	Haemoglobin
	Sport physical activity	Physical activity	0.936511	< 0.001	Physical activity
	Red wine intake	Alcohol intake	0.906913	< 0.001	Alcohol intake
	Urin: albumin per creatinine	Urin: albumin	0.895008	< 0.001	Urin: albumin
	Total cholesterol	LDL cholesterol	0.894969	< 0.001	Total cholesterol
	Weight	Waist circumference	0.863007	< 0.001	none
	Hip circumferenec	BMI	0.856318	< 0.001	BMI
	Total fat intake	Caloric intake	0.827706	< 0.001	Caloric intake
	Waist circumference	BMI	0.819615	< 0.001	BMI
	Caloric intake	Total carbohydrate intake	0.818351	< 0.001	Caloric intake
	Waist circumference	Hip circumferenec	0.811155	< 0.001	none
	Test for collinearity (Spearman for binary variables)
Year	Var1	Var2	effect size	p-value	Variable kept
1990	Oral andibiabetics	Diabetic medication type1 dose	-0.998	< 0.001	none
	Diabetes (ADA criteria)	Diabetic medication type1 dose	-0.814	< 0.001	Diabetes (ADA criteria)
2010	Oral andibiabetics	Diabetic medication type1 dose	-0.998	< 0.001	none
	Metformin	Diabetic medication type1 dose	-0.912	< 0.001	Metformin
2016	Corticosteroids	Corticosteroids dose	-0.998	< 0.001	Corticosteroids dose
	Oral andibiabetics	Diabetic medication type1 dose	-0.998	< 0.001	Diabetic medication type1 dose
	Oral anti-diabetics	Diabetic medication type1 dose	-0.969	< 0.001	Diabetic medication type1 dose
	Metformin	Diabetic medication type1 dose	-0.872	< 0.001	Diabetic medication type1 dose
	Lipid-lowering drugs	Dose of Statin	-0.952	< 0.001	Dose of Statin
	Statin	Dose of Statin	-0.981	< 0.001	Dose of Statin
	Additional sugar on food/drinks	Additional sugar on food/drinks, amount (tea spoon)	-0.946	< 0.001	Additional sugar on food/drinks, amount (tea spoon)
	Thyroid hormones	Thyroid hormone dose	-0.981	< 0.001	Thyroid hormone dose

## Sheet: Table 5
Supplementary Table 5a. Explanatory power of contemporary variables
	db-RDA
Covariates	F	R2	Adj.R2	p-value	FDR
Stool moisture	7.02156	0.0276679	0.0244483	0.0001	0.00645
Defecation frequency	3.56581	0.0142097	0.0109455	0.0001	0.00645
Hard stools	4.39028	0.0174481	0.0141946	0.0001	0.00645
Obstipation	4.50217	0.0178863	0.0146343	0.0001	0.00645
Beta blocker	2.7152	0.0108502	0.0075749	0.0008	0.04128
Age	2.36948	0.00947947	0.0061996	0.0017	0.0731
Mineral water intake	2.33697	0.00935039	0.00607009	0.0022	0.0810857
Beer intake	2.34502	0.00938238	0.00610218	0.0031	0.0888667
Physical activity	2.4434	0.00977283	0.00649394	0.0028	0.0888667
Liver stiffness (IQR)	2.56635	0.0102604	0.00698316	0.0036	0.09288
Problems with stool	2.37516	0.00950202	0.00622222	0.004	0.0938182
Education years	2.18075	0.00872985	0.0054475	0.0047	0.10105
Non-sports physical activity	2.11229	0.00845769	0.00517444	0.007	0.138923
Haemoglobin	2.05014	0.00821049	0.00492642	0.0086	0.158486
Coffee intake	2.04401	0.00818611	0.00490196	0.0094	0.16168
Fat removal when cooking	1.96132	0.00785711	0.00457186	0.0105	0.169313
Fruit score	1.98645	0.0079571	0.00467219	0.0119	0.172
History of cholecystectomy	1.96264	0.00786234	0.00457712	0.012	0.172
Beets intake	1.91214	0.00766132	0.00437543	0.0138	0.176914
Estimated GFR	1.90182	0.00762024	0.00433421	0.0141	0.176914
White wine intake	1.91029	0.00765393	0.00436802	0.0144	0.176914
Supplementary Table 5b. Non-redundant cumulative effect size of contemporary variables
	stepwise db-RDA
Covariates	Adj.R2	AIC	F	p-value
Stool moisture	0.024448	1257.7	7.0216	0.009901
Obstipation	0.034878	1256.2	3.4746	0.009901
Defecation frequency	0.043602	1255.2	3.0455	0.009901
Liver stiffness (IQR)	0.050445	1254.6	2.5659	0.009901
Beta blocker	0.056928	1254	2.4748	0.009901
Physical activity	0.061776	1254	2.0537	0.019802
Beer intake	0.065723	1254.1	1.8205	0.059406
Mineral water intake	0.069544	1254.3	1.7863	0.019802

## Sheet: Table 6
Supplementary Table 6a. Combined effect size of contemporary covariates (2016)
Category	Variables	Pearson cumulative R
Health	Liver stiffness	0.134905
Bowel	Stool moisture+Defecation frequency	0.114621
Diet	Beer intake	0.0745152
Medication	Beta blocker	0.014489
Anthropometrics	Age	0.00941549
Lifestyle	Physical activity	-0.0291568
Total	Liver stiffness+Defecation frequency	0.170966
Supplementary Table 6b. Combined effect size of covariates from each year (1990-2016)
Category	Variables	Pearson cumulative R
Health	Liver stiffness.2016	0.134905
Blood parameters	GGT.2010+AST.1990	0.133345
Bowel	Stool moisture+Defecation frequency	0.114621
Diet	C.Total.lipid.fat.2010+Beer intake.2016	0.0789355
Medication	Beta blocker.2016	0.014489
Anthropometrics	Age.2016	0.00941549
Lifestyle	Physical activity.2016	-0.0291568
Total	Liver stiffness.2016+Stool moisture.2016+Defecation frequency.2016+GGT.2010+AST.1990	0.207045
Supplementary Table 6c. Combined effect size of covariates from each year (1990-2016), avarage, and delta history
Category	Variables	Pearson cumulative R
Blood parameters	GGT.2010+Hemoglobin.1990-2016+ALT.1995+2016	0.184787
Health	Liver stiffness.2016	0.134905
Diet	Dumpling intake (mean of 1995-2016)	0.120076
Bowel	Stool moisture+Defecation frequency	0.114621
Lifestyle	Physical activity.leisure.2000-2016+Physical activity.leisure.2005-2016	0.0147798
Medication	Beta blocker.2016	0.014489
Anthropometrics	Age.2016	0.00941549
total	Liver stiffness.2016+Stool moisture.2016+Defecation frequency.2016+GGT.2010+Hemoglobin.1990+2016+ALT.1995-2016+Dumpling intake (mean of 1995-2016)	0.255021

## Sheet: Table 7
Supplementary Table 7a. Explanatory power of historical variables of each year (1990-2010)
		db-RDA
Year	Covariates	F	R2	Adj.R2	p-value	FDR
1990	Beta blocker	2.6589	0.0106272	0.00735114	0.0019	0.0608
1990	Aspartate aminotransferase	2.37459	0.00949975	0.00621995	0.0054	0.0864
2010	Caloric intake	2.81138	0.0112311	0.00795699	0.0005	0.042
2010	Gamma-glutamyl transferase	2.6979	0.0107817	0.00750618	0.0038	0.06384
2010	Total protein intake	2.41439	0.00965771	0.00637843	0.002	0.06384
2010	Fasting glucose	2.35506	0.00942223	0.00614218	0.0057	0.0798
2010	Cereal fiber score	2.34489	0.00938185	0.00610166	0.003	0.06384
2010	Total fat intake	2.29526	0.00918477	0.00590393	0.0033	0.06384
Supplementary Table 7b. Non-redundant cumulative effect size of significant covariates from each year (1990-2016)
		db-RDA			stepwise db-RDA
Covariates	Category	F	R2	Adj.R2	Adj.R2	AIC	F	p-value
Stool moisture.2016	Present	7.02156	0.0276679	0.0244483	0.024448	1257.7	7.0216	0.009901
Obstipation.2016	Present	4.50217	0.0178863	0.0146343	0.034878	1256.2	3.4746	0.009901
Defecation frequency.2016	Present	3.56581	0.0142097	0.0109455	0.043602	1255.2	3.0455	0.009901
Gamma-glutamyl transferase.2010	Past	2.6979	0.0107817	0.00750618	0.050704	1254.5	2.6327	0.009901
Caloric intake.2010	Past	2.81138	0.0112311	0.00795699	0.05767	1253.9	2.5996	0.009901
Physical activity.2016	Present	2.4434	0.00977283	0.00649394	0.063741	1253.4	2.3702	0.009901
Liver stiffness (IQR).2016	Present	2.56635	0.0102604	0.00698316	0.069424	1253.1	2.2702	0.009901
Beta blocker.1990	Past	2.6589	0.0106272	0.00735114	0.074418	1253	2.0919	0.009901
Mineral water.2016	Present	2.33697	0.00935039	0.00607009	0.078317	1253.1	1.8079	0.029703
Beer intake.2016		2.34502	0.00938238	0.00610218	0.081982	1253.3	1.7457	0.059406
Cereal fiber score.2010	Past	2.34489	0.00938185	0.00610166	0.085382	1253.6	1.6754	0.039604
Hard stools.2016	Present	4.39028	0.0174481	0.0141946
Beta blocker.2016	Present	2.7152	0.0108502	0.0075749
Total protein intake.2010	Past	2.41439	0.00965771	0.00637843
Problems with stool.2016	Present	2.37516	0.00950202	0.00622222
Aspartate aminotransferase.1990	Past	2.37459	0.00949975	0.00621995
Age.2016	Present	2.36948	0.00947947	0.0061996
Fasting glucose.2010	Past	2.35506	0.00942223	0.00614218
Total fat intake.2010	Past	2.29526	0.00918477	0.00590393

## Sheet: Table 8
Supplementary Table 8a. Explanatory power of average history variables
	db-RDA
Covariates	F	R2	Adj.R2	p-value	FDR
Dumpling intake (mean of 1995-2016)	2.68874	0.0107454	0.00746976	0.0013	0.0936
Supplementary Table 8b. Explanatory power of delta history variables
		db-RDA
Period	Covariates	F	R2	Adj.R2	p-value	FDR
1990-2016	Beta blocker	3.60236	0.0143536	0.0110899	0.0001	0.0031
1990-2016	Hemoglobin	2.60133	0.0103991	0.00712228	0.0007	0.01085
1995-2016	Beta blocker	2.67524	0.010692	0.00741612	0.0007	0.0567
1995-2016	Alanine transaminase	2.56908	0.0102712	0.006994	0.0015	0.06075
2000-2016	Beta blocker	3.27523	0.0130642	0.00979617	0.0003	0.0246
2000-2016	Non-sports physical activity	2.67703	0.010699	0.0074232	0.001	0.041
2005-2016	Beta blocker	2.50143	0.010003	0.00672489	0.002	0.07
2005-2016	Non-sports physical activity	2.46791	0.00987005	0.00659147	0.002	0.07
2005-2016	Alanine transaminase	2.4142	0.00965693	0.00637765	0.0025	0.07
Supplementary Table 8c. (Non-redundant cumulative) effect size of current and delta history variables
		db-RDA			stepwise db-RDA
Covariates	Category	F	R2	Adj.R2	Adj.R2	AIC	F	p-value
Stool moisture.2016	Present	7.02156	0.0276679	0.0244483	0.024448	1257.7	7.0216	0.009901
Obstipation.2016	Present	4.50217	0.0178863	0.0146343	0.034878	1256.2	3.4746	0.009901
Beta blocker.1990-2016	Past	3.60236	0.0143536	0.0110899	0.044202	1255	3.2002	0.009901
Defecation frequency.2016	Present	3.56581	0.0142097	0.0109455	0.052841	1253.9	3.0306	0.019802
Liver stiffness (IQR).2016	Present	2.56635	0.0102604	0.00698316	0.059725	1253.3	2.5815	0.019802
Non-sports physical activity.2005-2016	Past	2.46791	0.00987005	0.00659147	0.065485	1253	2.2921	0.019802
Hemoglobin.1990-2016	Past	2.60133	0.0103991	0.00712228	0.070354	1252.9	2.0613	0.009901
Beer intake.2016	Present	2.34502	0.00938238	0.00610218	0.074956	1252.8	1.9914	0.019802
Alanine transaminase.2005-2016	Past	2.4142	0.00965693	0.00637765	0.078418	1253.1	1.6953	0.019802
Physical activity.2016	Present	2.4434	0.00977283	0.00649394	0.081622	1253.4	1.6271	0.019802
Mineral water intake.2016	Present	2.33697	0.00935039	0.00607009	0.084648	1253.8	1.579	0.09901
Hard stools.2016	Present	4.39028	0.0174481	0.0141946
Beta blocker.2000-2016	Past	3.27523	0.0130642	0.00979617
Beta blocker.1995-2016	Past	2.67524	0.010692	0.00741612
Non-sports physical activity.2000-2016	Past	2.67703	0.010699	0.0074232
Beta blocker.2016	Present	2.7152	0.0108502	0.0075749
Alanine transaminase.1995-2016	Past	2.56908	0.0102712	0.006994
Beta blocker.2005-2016	Past	2.50143	0.010003	0.00672489
Problems with stool.2016	Present	2.37516	0.00950202	0.00622222
Age.2016	Present	2.36948	0.00947947	0.0061996
Supplementary Table 8d. (Non-redundant cumulative) effect size of current and history variables - Figure 2a
		db-RDA			stepwise db-RDA
Covariates	Category	F	R2	Adj.R2	Adj.R2	AIC	F	p-value
Stool moisture.2016	Present	7.02156	0.0276679	0.0244483	0.024448	1257.7	7.0216	0.009901
Obstipation.2016	Present	4.50217	0.0178863	0.0146343	0.034878	1256.2	3.4746	0.009901
Beta blocker.1990-2016	Past	3.60236	0.0143536	0.0110899	0.044202	1255	3.2002	0.009901
Defecation frequency.2016	Present	3.56581	0.0142097	0.0109455	0.052841	1253.9	3.0306	0.009901
Dumpling intake (mean of 1995-2016)	Past	2.68874	0.0107454	0.00746976	0.060188	1253.2	2.7012	0.019802
Gamma-glutamyl transferase.2010	Past	2.6979	0.0107817	0.00750618	0.067499	1252.5	2.6947	0.009901
Caloric intake.2010	Past	2.81138	0.0112311	0.00795699	0.073519	1252	2.3618	0.009901
Liver stiffness (IQR).2016	Present	2.56635	0.0102604	0.00698316	0.07916	1251.7	2.2637	0.019802
Non-sports physical activity.2005-2016	Past	2.46791	0.00987005	0.00659147	0.084846	1251.4	2.2752	0.009901
Hemoglobin.1990-2016	Past	2.60133	0.0103991	0.00712228	0.08921	1251.4	1.9314	0.019802
Mineral water intake.2016	Present	2.33697	0.00935039	0.00607009	0.093218	1251.5	1.8373	0.019802
Physical activity.2016	Present	2.4434	0.00977283	0.00649394	0.096844	1251.7	1.7366	0.039604
Cereal fiber score.2010	Past	2.34489	0.00938185	0.00610166	0.099419	1252.1	1.4626	0.089109
Beer intake.2016	Present	2.34502	0.00938238	0.00610218	0.102012	1252.6	1.465	0.039604
Alanine transaminase.2005-2016	Past	2.4142	0.00965693	0.00637765	0.104379	1253.1	1.4046	0.079208
Hard stools.2016	Present	4.39028	0.0174481	0.0141946
Beta blocker.2000-2016	Past	3.27523	0.0130642	0.00979617
Beta blocker.2016	Present	2.7152	0.0108502	0.0075749
Beta blocker.1995-2016	Past	2.67524	0.010692	0.00741612
Non-sports physical activity.2000-2016	Past	2.67703	0.010699	0.0074232
Alanine transaminase.1995-2016	Past	2.56908	0.0102712	0.006994
Beta blocker.2005-2016	Past	2.50143	0.010003	0.00672489
Beta blocker.1990	Past	2.6589	0.0106272	0.00735114
Age.2016	Present	2.36948	0.00947947	0.0061996
Total protein intake.2010	Past	2.41439	0.00965771	0.00637843
Total fat intake.2010	Past	2.29526	0.00918477	0.00590393
Aspartate aminotransferase.1990	Past	2.37459	0.00949975	0.00621995
Problems with stool.2016	Present	2.37516	0.00950202	0.00622222
Fasting glucose.2010	Past	2.35506	0.00942223	0.00614218

## Sheet: Table 9
Supplementary Table 9a. Pairwise adonis for beta blocker intake
Category	SumsOfSqs	F.Model	R2	p-value	FDR
None vs. Current	0.345312	2.01004	0.00695493	0.023	0.0345
None vs. Chronic	0.521298	3.07311	0.0132993	0.001	0.003
Current vs. Chronic	0.25135	1.48159	0.0175374	0.11	0.11
Supplementary Table 9b. Assocation of count of beta blocker treatment with enterotypes
Fisher's exact test	FDR
p-value	Bact1 vs Bact2	Bact1 vs Prev	Bact1 vs Rum	Bact2 vs Prev	Bact2 vs Rum	Prev vs Rum
0.04607	0.0424	0.9638	1	0.0424	0.1122	0.9638

## Sheet: Table 10
Supplementary Table 10. Comparision of taxonomic abundance by beta blocker treatment (adjusted for age and stool moisture)
Genera	GLM standarized coef	p-value	FDR
g_Prevotella	-2.17395	0.000517222	0.0320678
g_Romboutsia	-1.10737	0.00151693	0.047025
g_Blautia	0.784956	0.00565209	0.0859538
g_Intestinibacter	-1.07306	0.00693176	0.0859538
g_Olsenella	-4.25078	0.00464056	0.0859538
g_Bilophila	0.711785	0.0106189	0.109728
g_Anaerostipes	0.665577	0.0165166	0.113407
g_Butyricicoccus	-1.01387	0.0166222	0.113407
g_Clostridium_sensu_stricto	-0.805857	0.016957	0.113407
g_Terrisporobacter	-0.844934	0.0182915	0.113407
g_Clostridium_IV	0.639991	0.0201287	0.113453
g_Dialister	-0.82185	0.0227186	0.11738
g_Oscillibacter	0.656471	0.0248941	0.118726
g_Aestuariispira	0.840501	0.038001	0.16829
g_Flavonifractor	0.556163	0.0427524	0.17671
g_Methanobrevibacter	0.524092	0.0641643	0.234011
g_Lactobacillus	0.548031	0.0633187	0.234011
g_Bacteroides	0.483697	0.0786968	0.2568
g_Akkermansia	0.513136	0.0761896	0.2568
g_Ruminococcus2	0.457171	0.104795	0.309394
g_Sporobacter	0.476704	0.102607	0.309394
g_Gemmiger	0.362748	0.18547	0.522689
g_Butyricimonas	0.350568	0.205326	0.541509
g_Anaerotruncus	0.340378	0.209616	0.541509
g_Clostridium_XlVa	0.317911	0.253166	0.544294
g_Dorea	-0.35058	0.251864	0.544294
g_Coprococcus	-0.340729	0.268844	0.544294
g_Odoribacter	0.328389	0.231745	0.544294
g_Coprobacter	0.300298	0.272147	0.544294
g_Turicibacter	-0.353006	0.243407	0.544294
g_Desulfovibrio	-0.347368	0.258351	0.544294
g_Barnesiella	-0.404817	0.288585	0.558624
g_Holdemanella	-0.322141	0.306342	0.558624
g_Hespellia	0.288735	0.304499	0.558624
g_Roseburia	-0.293719	0.33531	0.56187
g_Alistipes	0.272559	0.328565	0.56187
g_Parasutterella	0.273217	0.321209	0.56187
g_Adlercreutzia	0.231133	0.409431	0.653698
g_Escherichia.Shigella	-0.253645	0.411197	0.653698
g_Clostridium_XlVb	0.195529	0.48644	0.735592
g_Veillonella	0.189852	0.486434	0.735592
g_Parabacteroides	0.169152	0.544778	0.796651
g_Victivallis	0.165108	0.552516	0.796651
g_Bifidobacterium	0.155247	0.576055	0.810089
g_Mogibacterium	0.146617	0.596221	0.810089
g_Faecalicoccus	-0.155519	0.601034	0.810089
g_Fusicatenibacter	0.137071	0.629099	0.812587
g_Enterorhabdus	-0.15005	0.624208	0.812587
g_Clostridium_XVIII	-0.125647	0.66327	0.822455
g_Pseudoflavonifractor	0.123553	0.658371	0.822455
g_Senegalimassilia	0.102488	0.711166	0.864554
g_Collinsella	-0.0988857	0.741253	0.875395
g_Streptococcus	0.0812691	0.762441	0.875395
g_Howardella	0.0905581	0.750374	0.875395
g_Ruminococcus	0.0611585	0.833246	0.930152
g_Sutterella	0.0568179	0.840137	0.930152
g_Faecalibacterium	0.0356202	0.901574	0.947416
g_Intestinimonas	0.0426807	0.883896	0.947416
g_Phascolarctobacterium	-0.0381656	0.893746	0.947416
g_Hydrogenoanaerobacterium	0.00630214	0.982545	0.982545
g_Paraprevotella	0.0156128	0.953974	0.982545
g_Anaerosporobacter	0.00794381	0.977859	0.982545

[truncated: 11 more sheets: Table 11, Table 12, Table 13, Table 14, Table 15, Table 16, Table 17, Table 18, Table 19, Table 20, Table 21]
