# Supplementary material for: Long-term life history predicts current elderly gut microbiome
Source: Research Square preprint supplement (doi:10.21203/rs.3.rs-130812/v1), 2021-01-25
Supplement: Supplementary file 1 [file dbcf7c4d1e84d1be79877c80.pdf]

**a**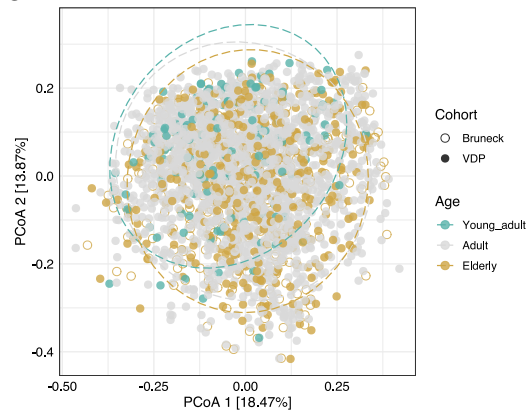**b**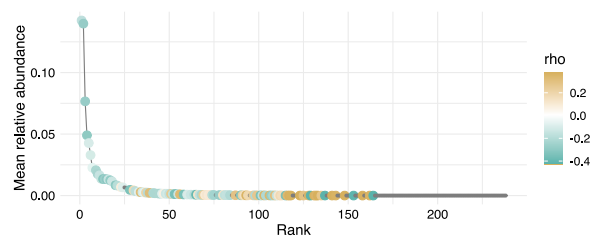**c**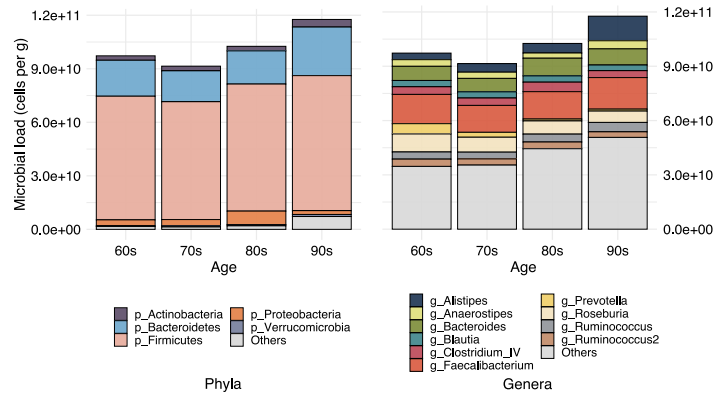**d**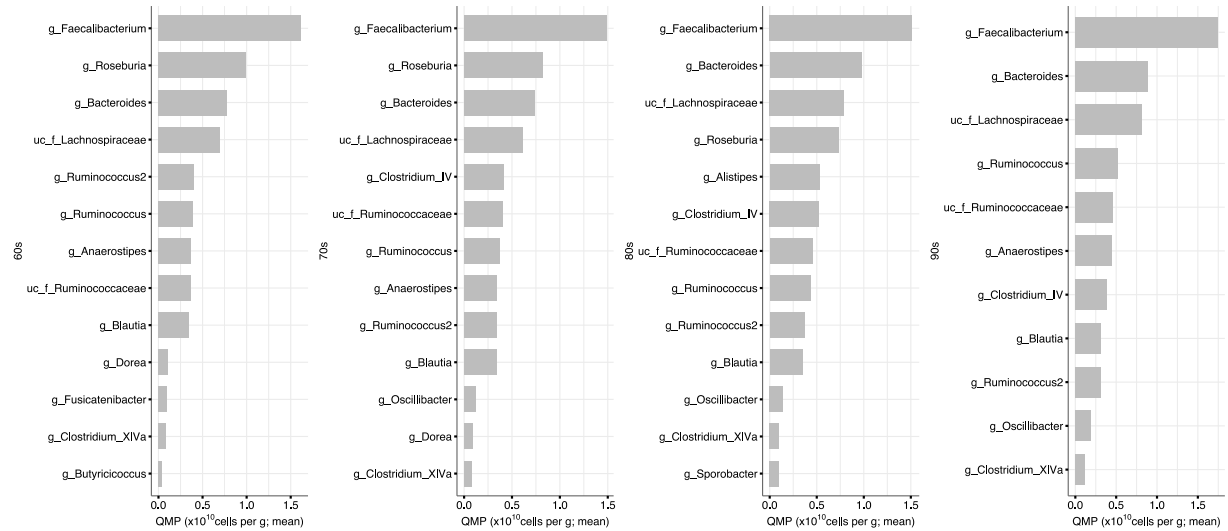

**Extended Data Fig. 1. Microbial characteristics of elderly community.** (a) Microbial composition by age categories (Adonis  $r^2 = 0.006$ ,  $p = 0.001$ ) based on relative microbial profiling (RMP). Young adults:  $18 \leq \text{age} < 30$ , adults:  $30 \leq \text{age} < 65$ , elderly:  $65 \leq \text{age}$ . Principal coordinate analysis (PCoA) was performed using Bray-Curtis dissimilarity. (b) Rank abundance plot of genera associated with age in the elderly subjects ( $\text{age} \geq 65$ ). Taxonomic abundances were centered log-ratio (clr) transformed and adjusted for gender, BMI, antibiotics intake, and stool moisture ( $\rho$  range =  $-0.43$ - $0.37$ ,  $\text{FDR} < 0.1$ ). Green and brown dots indicate genera negatively and positively correlated with age, respectively. (c) Quantitative profiling of phyla, genera, and (d) core taxa (95% of prevalence) in the Bruneck Study cohorts ( $n = 304$ ) across decadal age groups.

**a**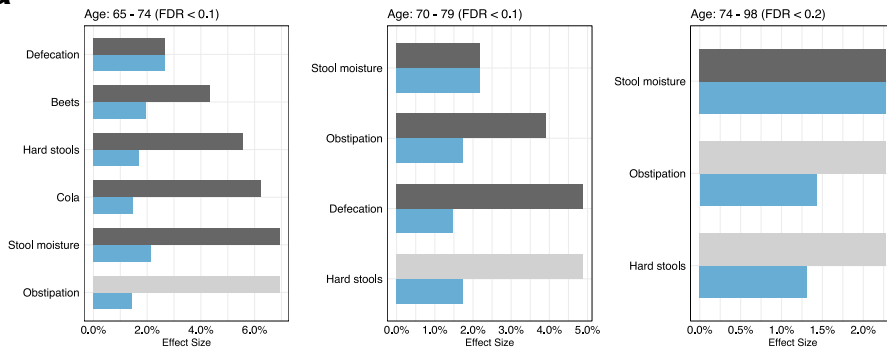**b**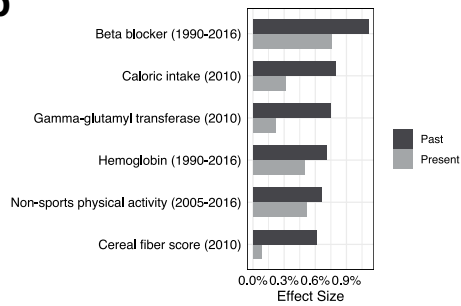**c**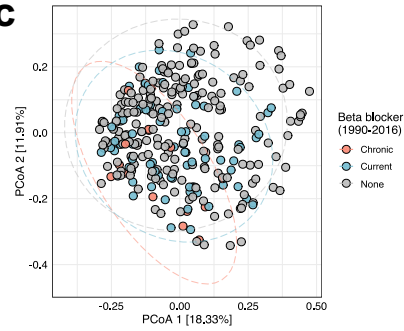**d**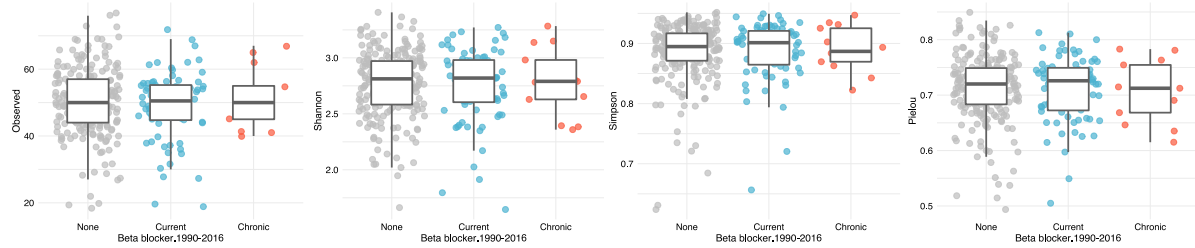**e**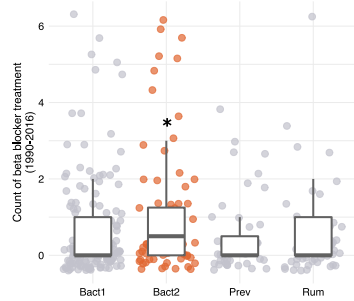**f**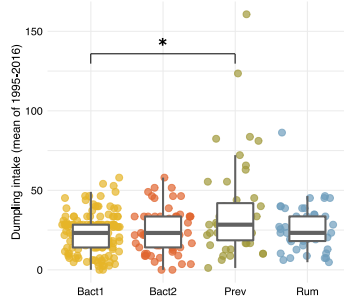**g**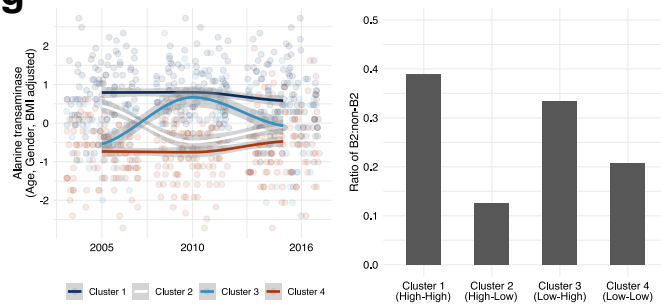

**Extended Data Fig. 2. Variables driving the Bruneck elderly gut community variation.**

(a) Each age window includes the same number of elderly subjects ( $n = 156$ ). Blue: individual effect size. Dark grey: cumulative effect size. Light grey: cumulative effect size – not included in the forward stepwise RDA model. (b) Comparison of individual effect size of historical parameters and contemporary covariates. (c) Ordination plot by beta blocker treatment (PCoA based on Bray-Curtis dissimilarity; Adonis  $r^2 = 0.013$ ,  $p < 0.001$ ). (d) Biodiversity of individuals by beta blocker treatment. None are significant. Comparison of (e) beta blocker treatment and (f) averaged dumpling intake between enterotypes. \*, FDR  $< 0.1$  by Kruskal-Wallis test followed by post-hoc Dunn's test. Boxes represent the 25th percentile, median, and 75th percentile. Whiskers represent the lowest and highest values of the data. (g) Clusters of alanine transaminase across the years. Cluster 1: high in the past and at present; Cluster 2: high in the past and low at present; Cluster 3: low in the past and high at present; Cluster 4: low in the past and at present. Comparisons of ratio of B2 and non-B2 by clusters were plotted by bar graphs. None are significant.

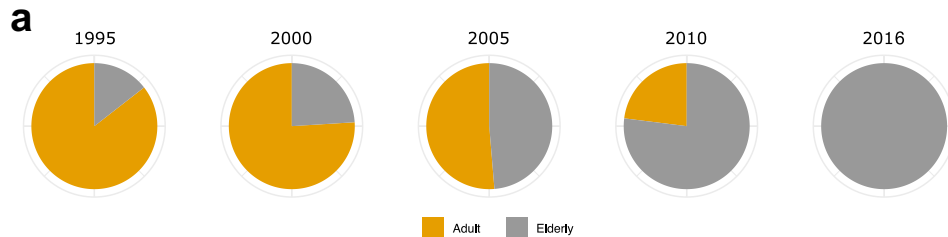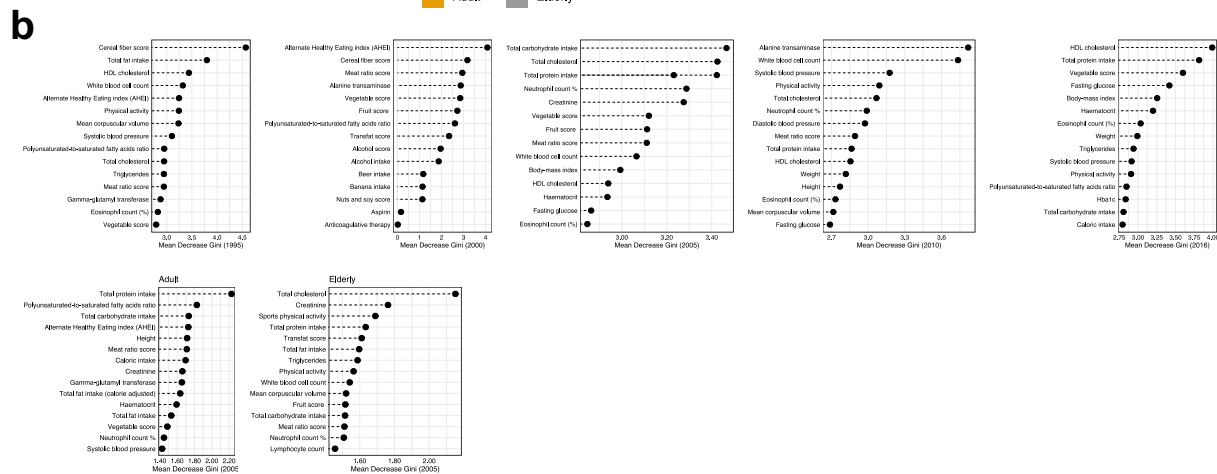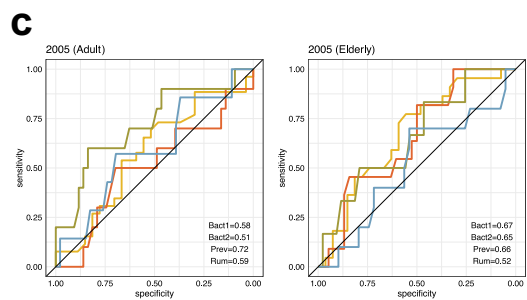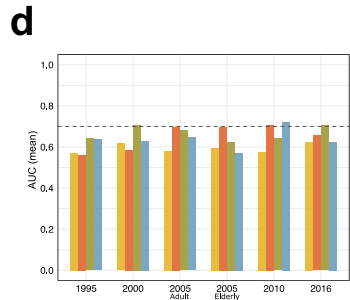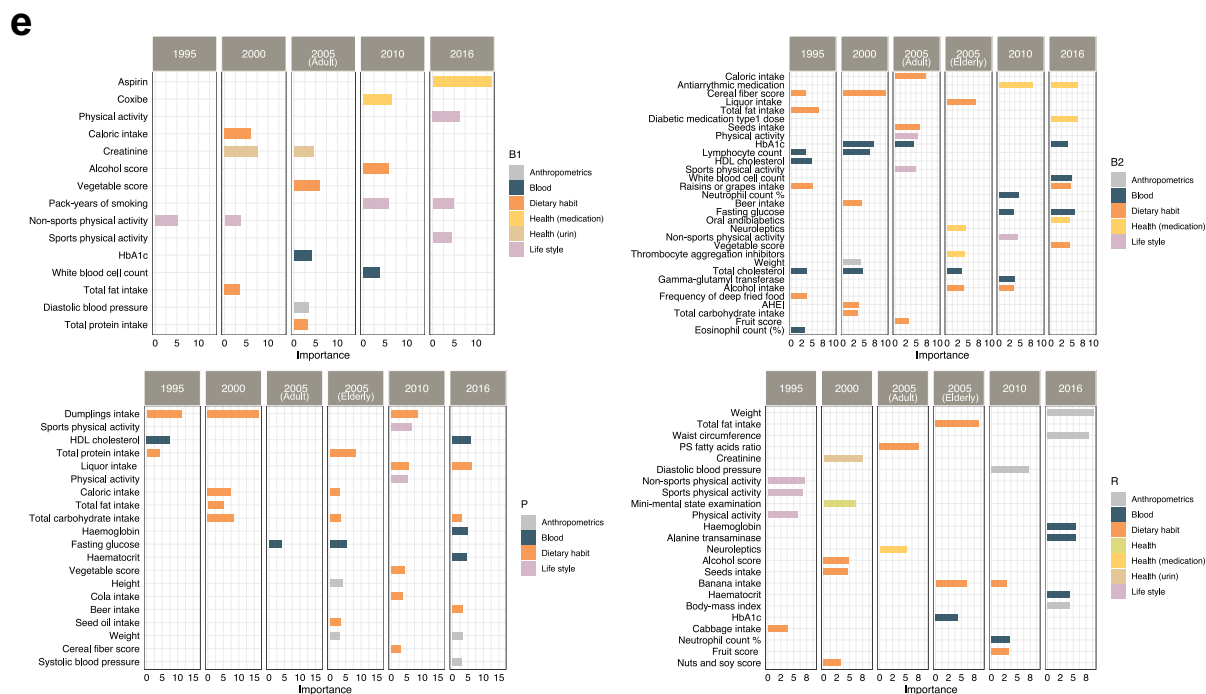

**Extended Data Fig. 3. Prediction variables of current microbiome using past variables.**

(a) The year 2005 has overall lower predictive power because it is a switching year in age demographics. It is a transition year between the younger adults (age < 65) and the elderly (age  $\geq$  65) subjects. This year, the proportion between the two groups becomes approximately 50:50 while the ratio is 75:25 or 85:15 for other years (either dominated by adults or elderly depending on the year). Therefore, the year 2005 was analyzed separately by the different age groups (the adults vs. the elderly). (b) The 15 most discriminatory variables for the enterotypes ranked by descending order of Mean Decrease Gini. (c) Receiver operating curve (ROC) for the evaluations 1995, 2000, 2005, 2010 and 2016 using the test dataset (n =101). (d) Area under the curve (AUC) obtained by 10-fold cross validation. Dashed line indicates AUC = 0.7. (e) Variables selected for enterotypes. Colors indicate different categories of the variables.
